# Supplementary material for: A family AA5_2 carbohydrate oxidase from Penicillium rubens displays functional overlap across the AA5 family
Source: PubMed Central journal article supplement (PMC6519835; doi:10.1371/journal.pone.0216546), 2019-05-15
Supplement: pone.0216546.s001.pdf [file pone.0216546.s001.pdf]

## Supplemental Figures

### A family AA5\_2 carbohydrate oxidase from *Penicillium rubens* displays functional overlap across the AA5 family

Filip Mollerup, Ville Aumala, Kirsti Parikka, Yann Mathieu, Harry Brumer, Maija Tenkanen and Emma Master

A

|                  |                                       |                                     |                                       |
|------------------|---------------------------------------|-------------------------------------|---------------------------------------|
| <i>Fgr</i> GaOx  | 224 - H D M F C P G I S - 232         | 240 - V V T G G - 244               | 270 - R G Y Q S S A T - 277           |
| <i>Pwi</i> AA5_2 | 220 - H D M F C S G M S - 228         | 236 - L V T G G - 240               | 266 - R G Y Q A S A T - 273           |
| <i>Cgr</i> RaOx  | 484 - H D M F C P G M N - 492         | 477 - V I N G G - 481               | 530 - R G Y Q S S V T - 537           |
| <i>Cgr</i> AlcOx | 69 - H D M F C P G T S - 77           | 85 - I V T G G - 89                 | 118 - R G Y Q S S C T - 125           |
| <i>Fgr</i> GaOx  | 286 - I G G S W S G - 292             | 332 - D N H A W L F G W K - 341     | 345 - V F Q A G P S T A M N W Y - 357 |
| <i>Pwi</i> AA5_2 | 282 - I G G S W N G - 288             | 329 - D S H G W L F G W K - 338     | 342 - V F Q G G P S K N M N W Y - 354 |
| <i>Cgr</i> RaOx  | 546 - I G G S Y T G - 552             | 599 - D N H A W L Y A W K - 607     | 612 - V F Q A G P S K N M N W Y - 624 |
| <i>Cgr</i> AlcOx | 134 - I G G S F S G - 140             | 167 - D S H A W L W S W K - 185     | 189 - V L Q A G P S K M N W Y - 201   |
| <i>Fgr</i> GaOx  | 394 - G K I L T F G G - 401           | 492 - R V Y H S I S L L L P D - 503 | 507 - V F N G G G G L C G - 516       |
| <i>Pwi</i> AA5_2 | 387 - G K I I T F G G - 394           | 481 - R V Y H S I S L L L P D - 500 | 504 - V F N G G S G L G V - 513       |
| <i>Cgr</i> RaOx  | 655 - G K I F A A G G - 663           | 752 - R N Y H S T G L L L P D - 763 | 767 - V M N G G G G L C Y - 776       |
| <i>Cgr</i> AlcOx | 234 - G K I F T Y G G - 241           | 331 - R N Y H S T A L L M A D - 344 | 346 - I W S G G G G L C G - 355       |
| <i>Fgr</i> GaOx  | 580 - T H T V N T D Q R R I P L - 593 |                                     |                                       |
| <i>Pwi</i> AA5_2 | 577 - T H T V N T D Q R R I S L - 590 |                                     |                                       |
| <i>Cgr</i> RaOx  | 853 - T H S I D T D Q R R I P L - 866 |                                     |                                       |
| <i>Cgr</i> AlcOx | 420 - T H T V N T D Q R R I P L - 433 |                                     |                                       |



**S1 File:** A new family AA5\_2 member displays dual activity preference

**Fig A. Analysis of AA5\_2 Sequences.** (A) Sequence conservation between *FgrGaOx*, *PruAA5\_2A*, *CgrRaOx* and *CgrAlcOx* in within 10 sequence stretches recognized for having identical amino acids in the 9 analyzed *Fusarium spp.* Yellow highlights identical amino acids throughout the four sequences of *FgrGaOx*, *PruAA5\_2A*, *CgrRaOx* and *CgrAlcOx*. Amino acids that also occur in Table 1 are in bold, red positions denotes variances. The placements of the sequence segments in the structure of *FgrGaOx* are highlighted in Figure 2C. (B) Sequence alignment of the 9 *Fusarium spp.* in subfamily AA5\_2 used to identify the 10 conserved sequence segments and information presented in Table 1. The conserved sequence segments were defined as strings of 4 or more consecutive and conserved amino acids in alignment of the *Fusarium spp.* sequences.

**S1 File:** A new family AA5\_2 member displays dual activity preference

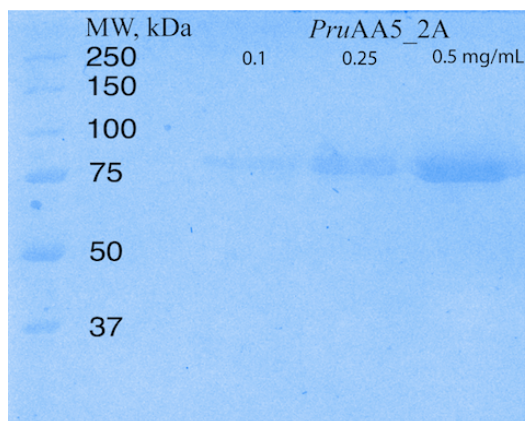

**Fig B. SDS-PAGE of pure *PruAA5\_2A* after production and purification.** The molecular weight of *PruAA5\_2A* was estimated to be 75 kDa, indicating that the purified enzyme is glycosylated.

**S1 File: A new family AA5\_2 member displays dual activity preference**

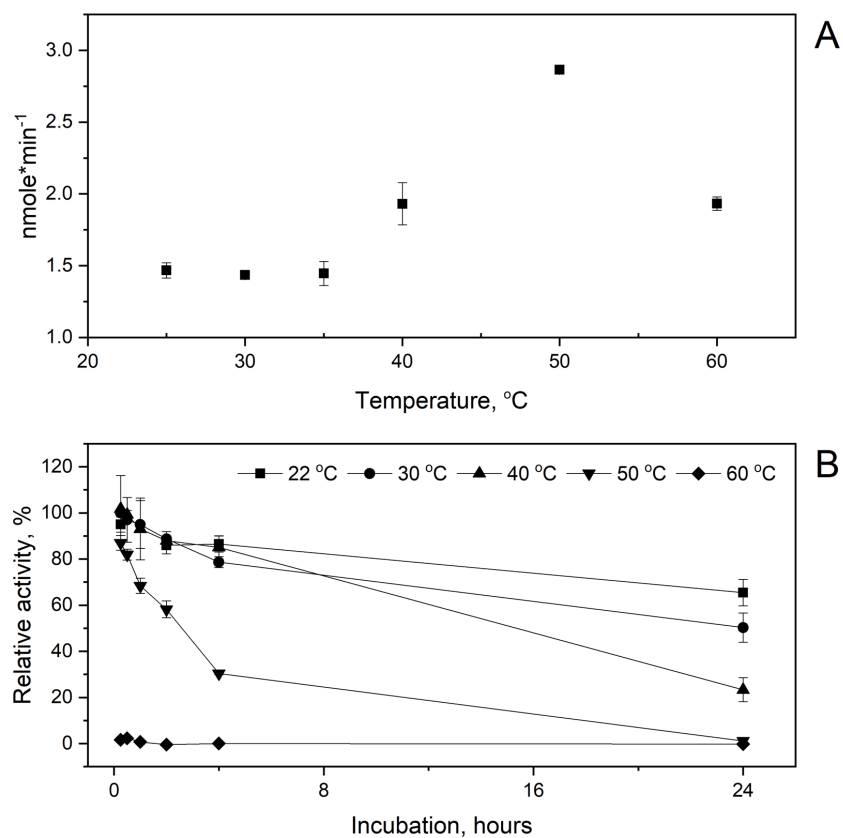

**Fig C. Effect of temperature on *PruAA5\_2A* activity.** (A) Activity on 300 mM raffinose in 20 mM MOPS (pH 7.5). (B) Residual activity at 30 °C after 15, 30 min or 1, 2, 4 and 24 hours at 22, 30, 40, 50 and 60 °C in 20 mM MOPS (pH 7.5). n=4; error bars indicate standard deviation.

**S1 File:** A new family AA5\_2 member displays dual activity preference

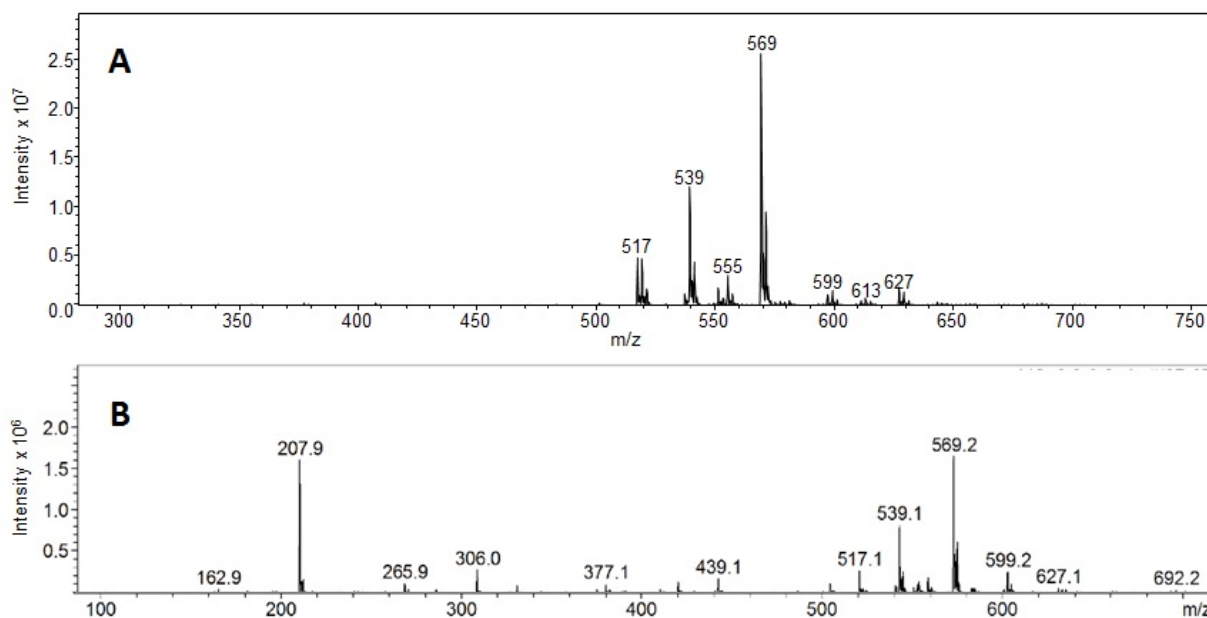

**Fig D. Analysis of oxidized products by mass spectrometry.** (A) Negative mode ESI-MS spectra of oxidized raffinose produced by *Cgr*RaOx -catalyzed reaction (3), and (B) by *Pru*AA5\_2A -catalyzed reaction. m/z 517, uronic acid; m/z 539, unoxidized raffinose (Cl<sup>-</sup> adduct); m/z 569, aldehyde product reacted with methanol (Cl<sup>-</sup> adduct); m/z 207.9, MOPS buffer.

S1 File: A new family AA5\_2 member displays dual activity preference

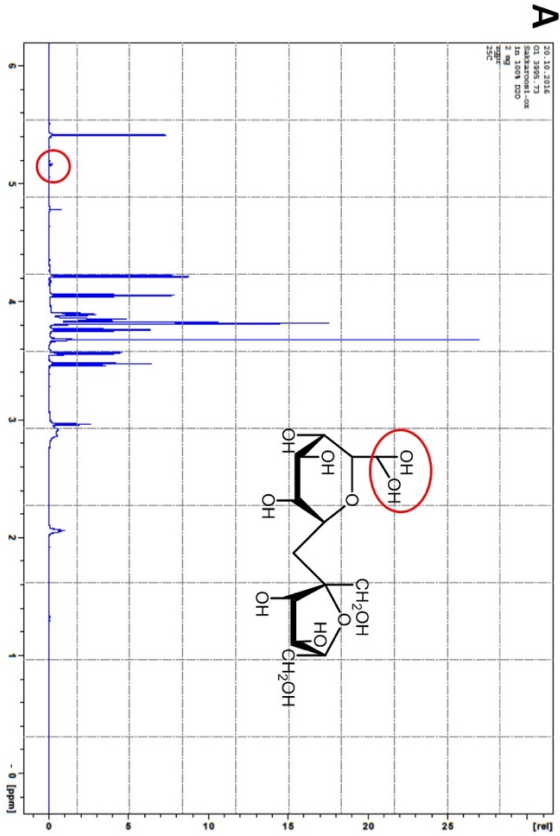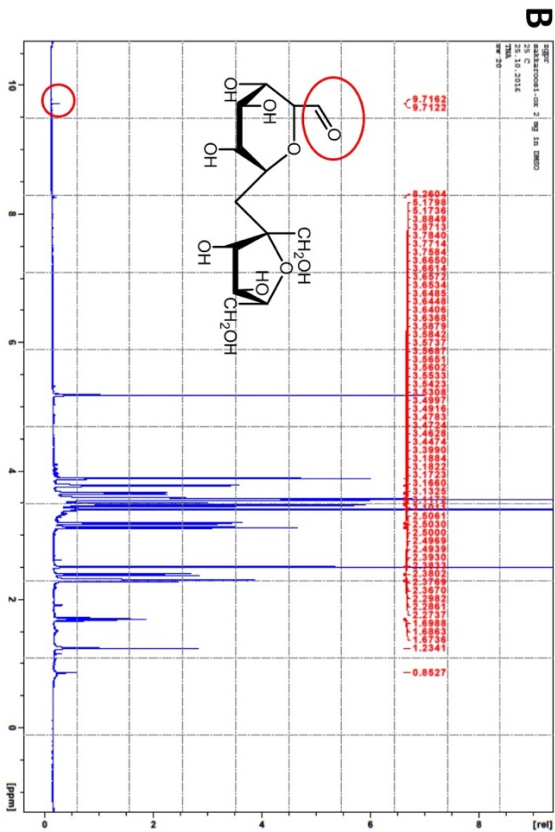

**S1 File:** A new family AA5\_2 member displays dual activity preference

**Fig E. <sup>1</sup>H NMR spectra of sucrose oxidation products.** (A) Analyzed in D<sub>2</sub>O, and (B) DMSO-d<sub>6</sub>. Chemical shifts indicating the oxidized product formation and putative oxidation sites as hydrates (A) and aldehydes (B) marked with a ring. Due to low degree of oxidation the final structure of the oxidation product could not be determined.



**S1 File: A new family AA5\_2 member displays dual activity preference**

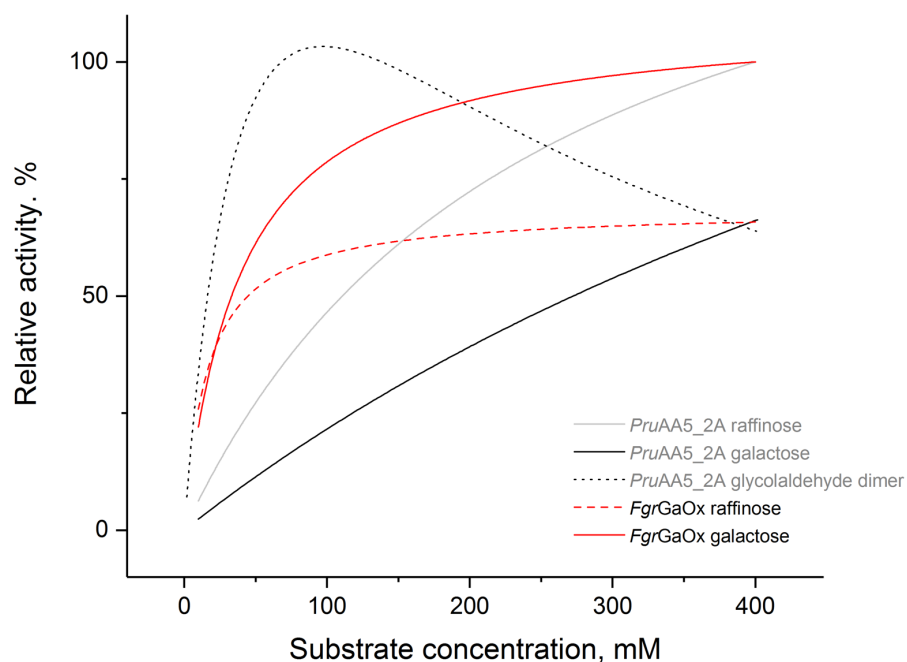

**Fig F. Comparative plot of *PruAA5\_2A* and *FgrGaOx* substrate kinetics using the calculated Michealis-Menten plot from kinetical analysis.** The activity axis (y-axis) were converted to relative activity for easy comparison. Actual kinetic parameters are present in Fig 6 for *PruAA5\_2A* and the discussion for *FgrGaOx*. No activity on glycolaldehyde dimer was detected for *FgrGaOx*.
